# Supplementary material for: Direct Ionic Regulation of the Activity of Myo-Inositol Biosynthesis Enzymes in Mozambique Tilapia
Source: PLOS journal article supplement (doi:10.1371/journal.pone.0123212), 2015-06-11
Supplement: S1 (10.1371/journal.pone.0123212.s001) [file journal.pone.0123212.s001]

## SUPPLEMENTARY MATERIAL

### Direct ionic regulation of the activity of *myo*-inositol biosynthesis enzymes in Mozambique tilapia

#### S1 Figure

##### Consurf IMPase MSA

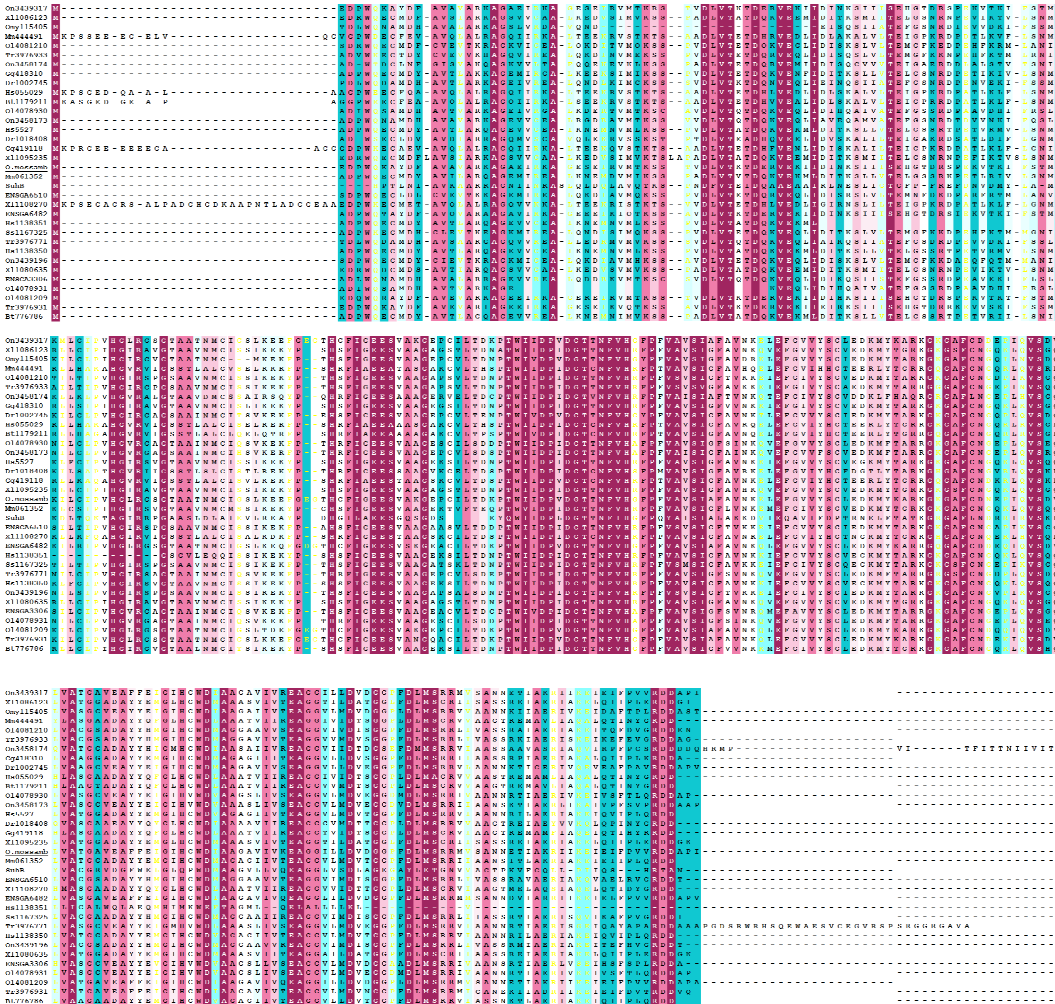

##### Phylogenetic tree

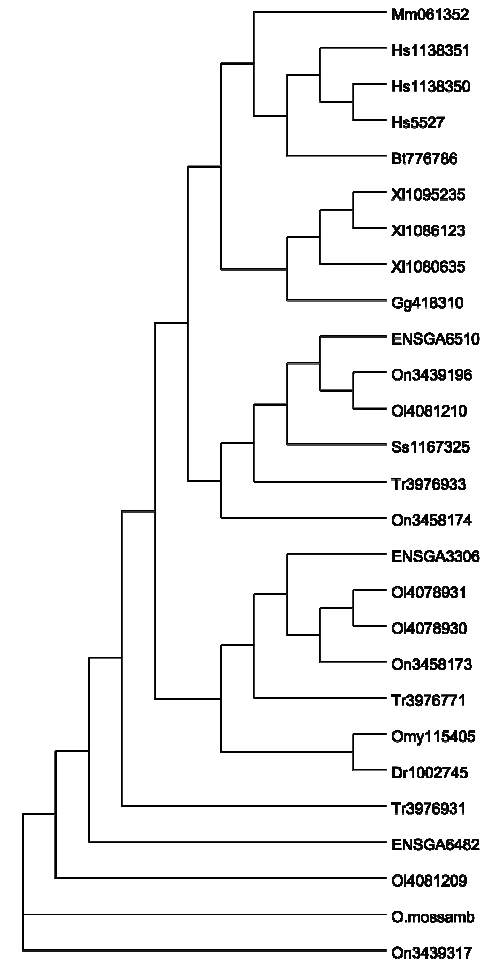

**S1 Figure.** MSA (T-COFFEE) and phylogenetic tree (PhyML; [http://www.phylogeny.fr/version2/cgi/one\\_task.cgi?task\\_type=phyml](http://www.phylogeny.fr/version2/cgi/one_task.cgi?task_type=phyml)) used for ConSurf analysis of IMPase sequences. Colors in MSA represent the conservation assigned per column.
