# Supplementary material for: Direct Ionic Regulation of the Activity of Myo-Inositol Biosynthesis Enzymes in Mozambique Tilapia
Source: PLOS journal article supplement (doi:10.1371/journal.pone.0123212), 2015-06-11
Supplement: S2 (10.1371/journal.pone.0123212.s002) [file journal.pone.0123212.s002]

## SUPPLEMENTARY MATERIAL

### Direct ionic regulation of the activity of *myo*-inositol biosynthesis enzymes in Mozambique tilapia

#### S2 Figure

##### Consurf MIPS

##### MSA

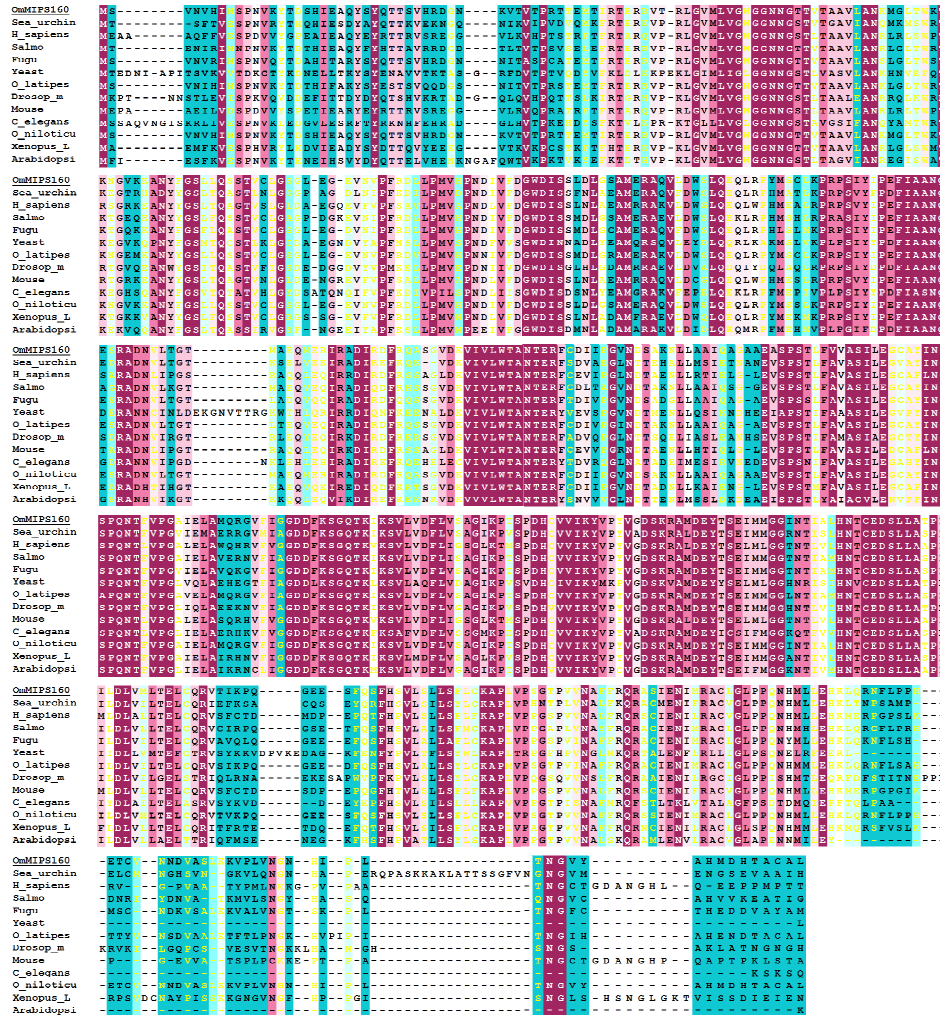

##### Phylogenetic tree

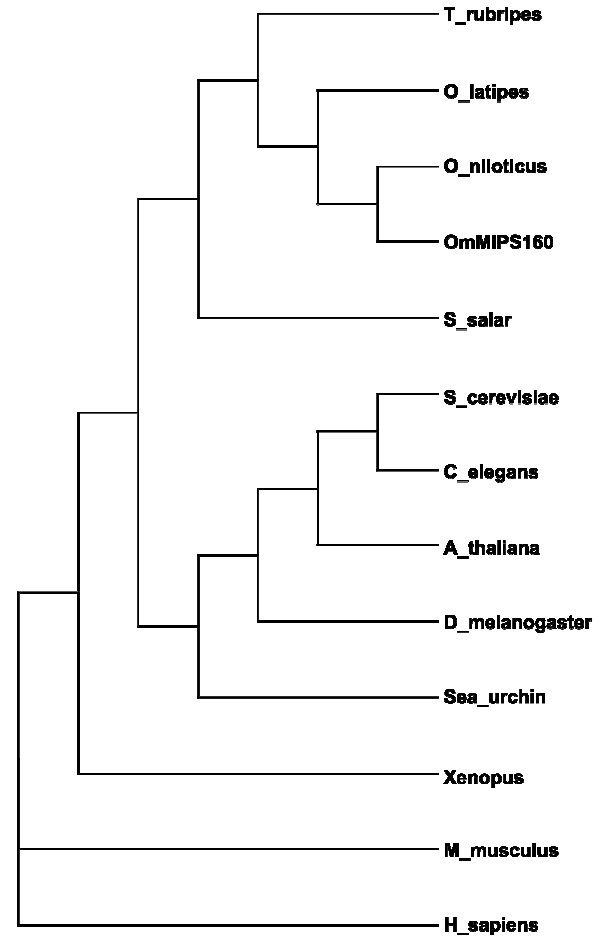

**S2 Figure.** MSA (T-COFFEE) and phylogenetic tree (PhyML; [http://www.phylogeny.fr/version2.cgi/one\\_task.cgi?task\\_type=phym1](http://www.phylogeny.fr/version2.cgi/one_task.cgi?task_type=phym1)) used for ConSurf analysis of MIPS sequences. Colors in MSA represent the conservation assigned per column.
