# Supplementary material for: Direct Ionic Regulation of the Activity of Myo-Inositol Biosynthesis Enzymes in Mozambique Tilapia
Source: PLOS journal article supplement (doi:10.1371/journal.pone.0123212), 2015-06-11
Supplement: S3 (10.1371/journal.pone.0123212.s003) [file journal.pone.0123212.s003]

## SUPPLEMENTARY MATERIAL

### Direct ionic regulation of the activity of *myo*-inositol biosynthesis enzymes in Mozambique tilapia

**S1 Table**

| MIPS-160 |         |                      |                       |                   |                   |                   | IMPase 1 |         |                      |                       |                   |                   |                   |
|----------|---------|----------------------|-----------------------|-------------------|-------------------|-------------------|----------|---------|----------------------|-----------------------|-------------------|-------------------|-------------------|
| Rank     | PDB Hit | C-score <sup>a</sup> | TM-score <sup>b</sup> | RMSD <sup>c</sup> | IDEN <sup>d</sup> | Cov. <sup>e</sup> | Rank     | PDB Hit | C-score <sup>a</sup> | TM-score <sup>b</sup> | RMSD <sup>c</sup> | IDEN <sup>d</sup> | Cov. <sup>e</sup> |
| 1        | 1vkoA   | 0.39                 | 0.9                   | 1.36              | 0.535             | 0.913             | 1        | 2hhmA   | 1.37                 | 0.957                 | 0.42              | 0.625             | 0.961             |
| 2        | 1pljA   | -0.75                | 0.881                 | 1.81              | 0.538             | 0.908             | 2        | 2bjjA   | -3.39                | 0.955                 | 0.75              | 0.62              | 0.968             |
| 3        | 1jkbB   | -0.15                | 0.77                  | 1.99              | 0.516             | 0.801             | 3        | 2cziA   | -5                   | 0.876                 | 1.34              | 0.461             | 0.905             |

(a) Confidence score for estimating the quality of predicted models. C-score is typically in the range of [-5,2], the higher the C-score, the higher the confidence of the model.

(b) TM-score is a measure of global structural similarity between query and template protein (from 0 to 1).

(c) Root Mean Square Deviation between residues that are structurally aligned by TM-align.

(d) IDEN is the percentage sequence identity in the structurally aligned region.

(e) Coverage of the alignment by TM-align and is equal to the number of structurally aligned residues divided by length of the query protein.

---

**S1 Table.** Quality parameters of MIPS-160 and IMPase 1 3D structural models resulting from I-TASSER prediction. The best models (rank 1) are shown in figure 3A.
